# Supplementary material for: Improvement on the genetic engineering of an invasive agricultural pest insect, the cherry vinegar fly, Drosophila suzukii
Source: Springer Nature journal article supplement (doi:10.1186/s12863-020-00940-5), 2020-12-01
Supplement: MOESM1 [file 12863_2020_940_MOESM1_ESM.pdf]

## Additional File 1

**Supplementary Table 1: *piggyBac* transformation rates in *D. sukuzii* AM strain**

| Construct | No injected embryos | Hatched larvae | Fertile crosses | No. transgenics | Transformation rate in % |
|-----------|---------------------|----------------|-----------------|-----------------|--------------------------|
| HMMA389   | 350                 | 185            | 40              | 1               | 2.5                      |
| HMMA185   | 475                 | 181            | 45              | 2*              | 4.4                      |
| HMMA223   | 290                 | 150            | 18              | 2               | 11                       |

\* For one transgenic F<sub>1</sub>, no line could be established.
