# Supplementary material for: Improvement on the genetic engineering of an invasive agricultural pest insect, the cherry vinegar fly, Drosophila suzukii
Source: Springer Nature journal article supplement (doi:10.1186/s12863-020-00940-5), 2020-12-01
Supplement: MOESM2 [file 12863_2020_940_MOESM2_ESM.pdf]

**Additional File 2.**

**Supplementary Table 2: List of transgenic lines**

| <b>Strategy</b>                  | <b>Construct</b>                                                              | <b>Transgenic lines</b>                                                                                                                                    |
|----------------------------------|-------------------------------------------------------------------------------|------------------------------------------------------------------------------------------------------------------------------------------------------------|
| <b>piggyBac</b>                  | HMMA006 (embryonic driver, <i>attP</i> ), Figs. 1B; 3A                        | 06_F5M2 (attP#1)                                                                                                                                           |
|                                  | HMMA389 (spermatogenesis driver), Fig. 2A                                     | 389_F25M1                                                                                                                                                  |
|                                  | HMMA185 ( $\phi$ C31 RMCE docking), Fig. 3B                                   | 185_F3F1 (RMCE#1)                                                                                                                                          |
|                                  | HMMA223 ( $\phi$ C31 RMCE self-docking), Fig. 4C                              | 223_M3M2 (RMCE-sd#1)<br>223_F7M1 (RMCE-sd#2)<br>223_F5F1 (RMCE-sd#3)<br>223_M10F1 (RMCE-sd#4)                                                              |
| <b><math>\phi</math>C31-int</b>  | HMMA182 (single <i>attB</i> donor), Fig. 3A<br>Injected into 06_F5M2 (attP#1) | attP#1_182_M12F1<br>attP#1_182_F8M1<br>attP#1_182_F15F1<br>attP#1_182_F25M1                                                                                |
| <b><math>\phi</math>C31-RMCE</b> | HMMA336 (RMCE donor TREp:Cas9), Fig. 3B<br>Injected into 185_F3F1 (RMCE#1)    | RMCE#1_336_M1M1<br>RMCE#1_336_M17F1<br>RMCE#1_336_M21M1<br>RMCE#1_336_M32M1<br>RMCE#1_336_M33F1<br>RMCE#1_336_M34M3<br>RMCE#1_336_F12F1<br>RMCE#1_336_F3F2 |
