# Supplementary material for: Improvement on the genetic engineering of an invasive agricultural pest insect, the cherry vinegar fly, Drosophila suzukii
Source: Springer Nature journal article supplement (doi:10.1186/s12863-020-00940-5), 2020-12-01
Supplement: MOESM3 [file 12863_2020_940_MOESM3_ESM.pdf]

## Additional File 3

### Supplementary Table 3: List of primers used

| Code    | Name             | Sequence 5'- 3'                                           |
|---------|------------------|-----------------------------------------------------------|
| HM#16   | sryaR4           | TTGTGTGTCATGGATGTTCAATCTAATC                              |
| HM#17   | Srya5UTR_F1      | GTACTTAGTTGAAAAGTTCAGCTTTACCCG                            |
| HM#34   | Ds_srya_GSP3     | GGCATCCAGGCTAATGGTCCGCTCCAAGTG                            |
| HM#35   | B2t_NcoI_F1      | GCAACCATGGGATGCCAAGAGAGATGAGCAGG                          |
| HM#36   | B2t_XbaI_R3      | CGATTCTAGACATCTTAACCGACTGTCAAGGATC                        |
| HM#42   | srya_GSP_F       | GCCTCTCTGGCTCCGATTCCCCCTAATG                              |
| HM#73   | hspEcoRIF2       | GCGAATCTCCAGAACTCAAACAGAAACC                              |
| HM#74   | hspEcoRIR        | GCGAATCTTGTGTGTTGTGTTTGTGGATGCAG                          |
| HM#76   | nos_GSPR         | GAGTCTCTCTTGCCTGGAATGCCG                                  |
| HM#77   | nos_GSPF         | GTACTGTCCCAAGAAGCCGATTATCAC                               |
| HM#94   | nos3UTRXbaIF     | GGTCTAGAGAACACATCCGGCAGGAGC                               |
| HM#95   | nos3UTRAflIII R  | ATACTTAAGACTGAGCTCCAAGCAGTGGTATCAACGCAGAG                 |
| HM#101  | SpeI-atBF        | CTAGTGTGAGGTGGAGTACGCGCCCGGGAGCCCAAGGGCACGCCCTGGCACCCGCAC |
| HM#102  | BbsI-BbsI        | CGGTCTTCGCGAAGAC                                          |
| HM#113  | BbsI_nosR        | GCGAAGACCCATATGGCGAAAGTCCGGCTCGAAAGTTACC                  |
| HM#117  | HM_Pub_R         | CATTGGAATCTCTGTCGCTGCGTTCCG                               |
| HM#123  | phi_nls_R        | CTAGACCTTCCGCTTCTTCTTTGGGGCCGCCGCTACGTCTTCCGTGCCGTCCTG    |
| HM#124  | SV40_SpeI_R      | CACACTAGTGATACATTGATGAGTTTGACAAACCACAAC                   |
| HM#131  | PLF2             | GTCAAATGACGCATGATTATCTTTTACG                              |
| HM#179  | DsRed_End        | CGAGGGCCGCCACCACCTGTTTCCTG                                |
| HM#203  | NotI_phiC31_R    | TCGCGGCCGCTAGACCTTCCGCTTCTTCTTTGG                         |
| HM#337  | SpeI_attB_R      | CTAGGTGCGGGTGCCAGGGCGTGCCCTTGGGCTCCCCGGGCGGTACTCCACCTCACA |
| HM#345  | nosP_BbsI_F      | CGGAAGACCGCGATTCTTTCAGTATCTCAAATCGCCCCGGAC                |
| HM#368  | attP220_Fwd      | TCATCAATGTATCACTAGTACTGACGGACACACC                        |
| HM#369  | attP220_Rev      | CTGGCTGGGGAATCTGTACTAGTTCGCGCTCG                          |
| HM#469  | SpeI_gypsy_F     | GCTTACTAGTGATGGTCTCAAGCTTGTGAGATCGGC                      |
| HM#470  | Apal_SV40_R      | TTAGGGCCCCGCTTAAGATACATTGATGAGTTTGG                       |
| HM#560  | FH_Cas9_HidIII_F | CATCAAGCTTACAAGTTCATCAAGCCCATCTGG                         |
| HM#561  | FH_Cas9_XhoI_R   | CATGCTCGAGATAGGTTTTTCAGCCGTTCTCTCGATC                     |
| HM#584  | HM_EcoRI_TRE_F2  | TACGAATTCGGCGCGCTAGGCCGGCCGAATTC                          |
| HM#706  | HM_b2t_3UTR_F    | CGAGGATCCTAGGATTAACCTTCCCACTCAAGATCACACATG                |
| HM#707  | HM_b2t_3UTR_R    | GCCAAGCTTGTCTGCTTATAAATCAACATTTATTTCGTAACCC               |
| mfs#370 | AflIII-5pBac_F   | AACTTAAGTTAACCCTAGAAAGATAGTCTGC                           |
| MK153   | PhiC31_BsaI_F    | ATGGTCTCACATGGACACGTACGCGGGTGCTTACGAC                     |
| T7      | T7               | TAATACGACTCACTATAGGG                                      |
| CH6R    | CH_3'PIClaI_2    | CCATCGATGGAATGAACAGGACCTAACGC                             |
